# Supplementary material for: A UPLC-DAD-Based Bio-Screening Assay for the Evaluation of the Angiotensin Converting Enzyme Inhibitory Potential of Plant Extracts and Compounds: Pyrroquinazoline Alkaloids from Adhatoda vasica as a Case Study
Source: Molecules. 2021 Nov 18;26(22):6971. doi: 10.3390/molecules26226971 (PMC8617709; doi:10.3390/molecules26226971)
Supplement: Supplementary file 1 [file molecules-26-06971-s001.zip › molecules-1423328-supplementary.pdf]

## Supplementary material

### Supplementary Figure Legends

**Figure S1:** ACE inhibition assay by (A) Captopril and (B) Lisinopril.

**Figure S2:** HPLC-DAD profiles of compounds **1**, **2** and **3** purified from fraction (F1) using preparative recycling HPLC.

**Figure S3:** Total ion chromatogram (TIC) of the most active fraction with annotated peaks related to purified compounds (**A**) and LC-ESI-MS/MS based characterization of compounds **1-3** shown in (**B**, **C** and **D**), respectively.

**Figure S4 :** FTIR spectrum of Compound **1,2** and **3**.

**Figure S5:** Proton NMR spectrum of compound **1**.

**Figure S6:** C-13 NMR spectrum of compound **1**.

**Figure S7:** Proton NMR spectrum of compound **2**.

**Figure S8:** C-13 NMR spectrum of compound **2**.

**Figure S9:** Proton NMR spectrum of compound **3**.

**Figure S10:** C-13 NMR spectrum of compound **3**.

**Figure S11:** (A) 2D Structure of lisinopril, (B) 3D structure of lisinopril, (C) 3D interaction of lisinopril with ACE generated through Chimera, and (D) 2D interactions of lisinopril with ACE generated through PoseView.

**Figure S12:** (A) 2D Structure of captopril, (B) 3D structure of captopril (C) 3D interaction of captopril with ACE generated through Chimera, and (D) 2D interactions of captopril with ACE generated through PoseView.

### Supplementary Table Legends

**Table S1:** Reaction initial velocity of ACE in enzymatic assay.

**Table S1:** ACE inhibitory activity of plant extracts.

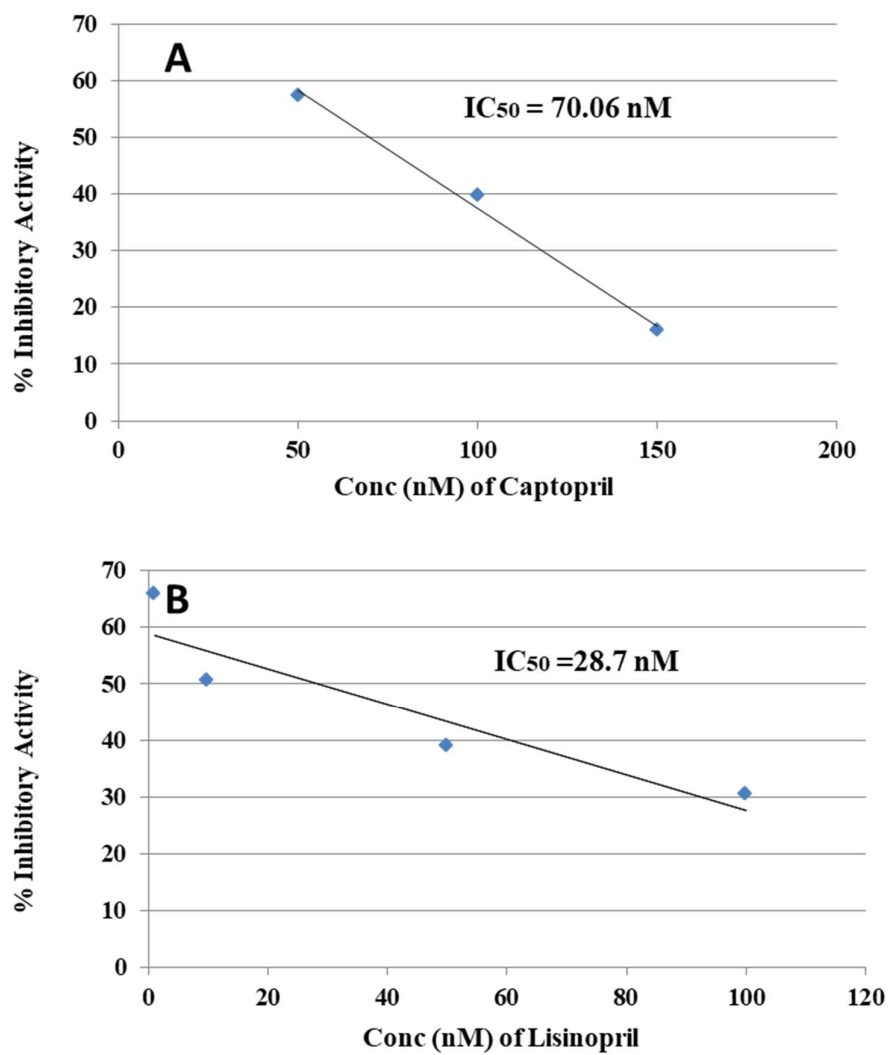

**Figure S1:** ACE inhibition assay by (A) Captopril and (B) Lisinopril.

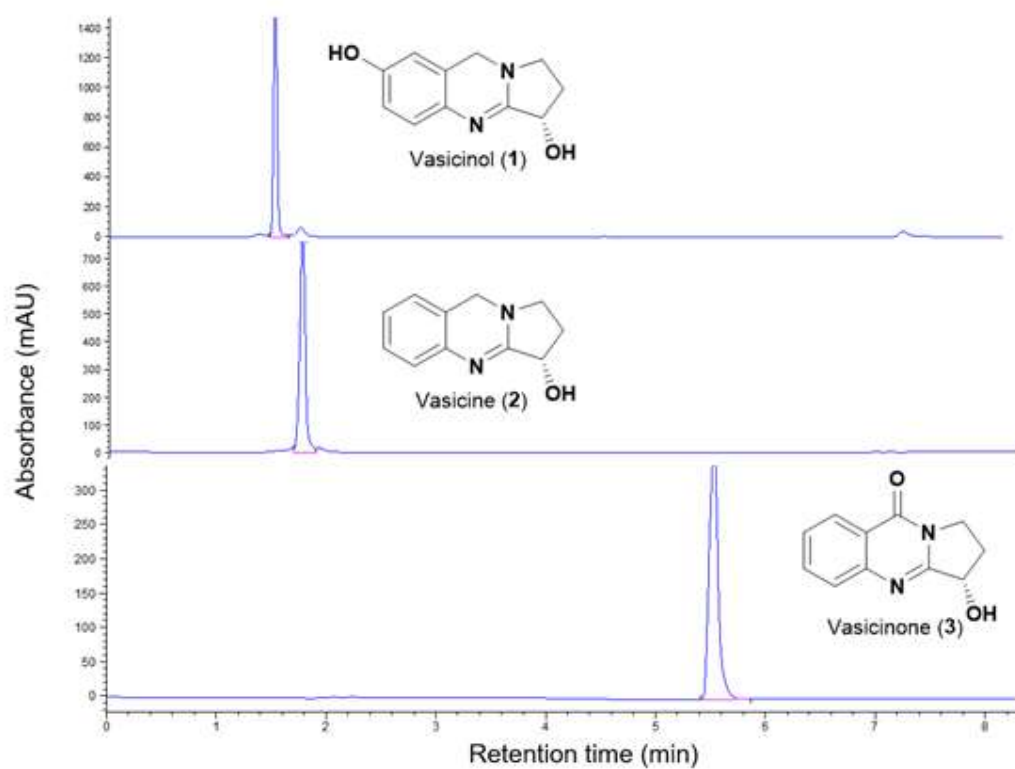

**Figure S2:** HPLC-DAD profiles of compounds **1**, **2** and **3** purified from fraction (F1) using preparative recycling HPLC.

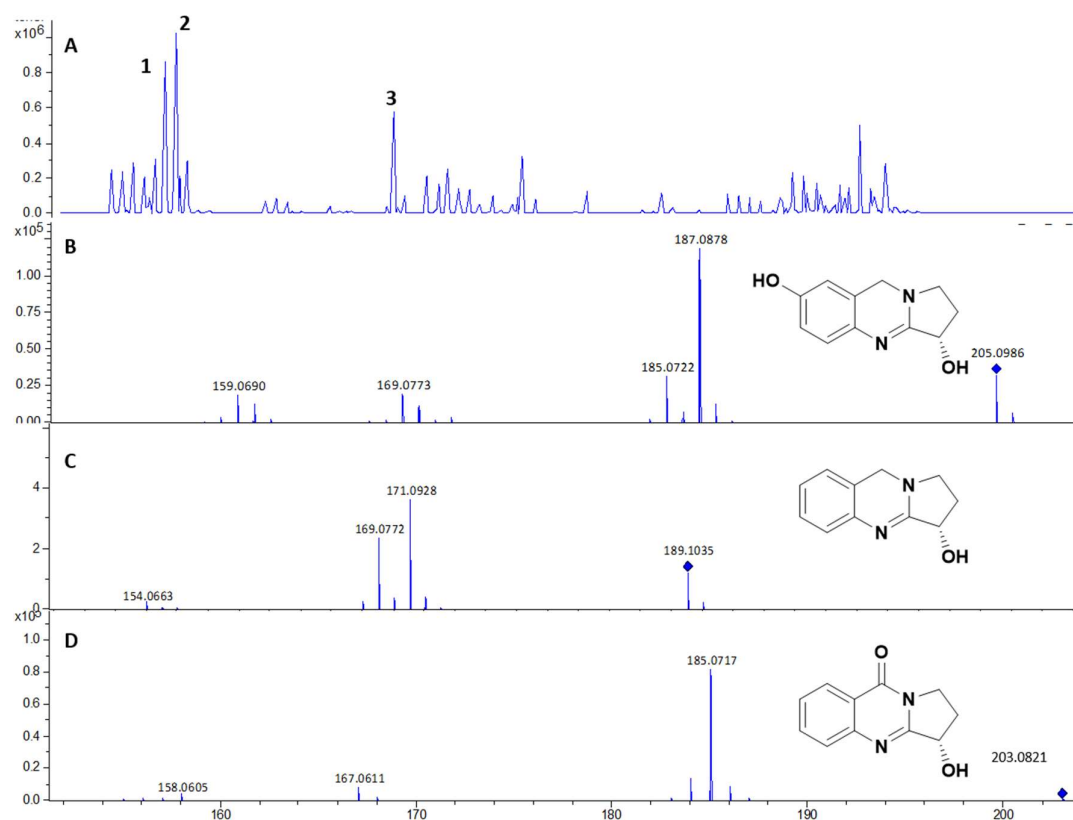

**Figure S3:** Total ion chromatogram (TIC) of the most active fraction with annotated peaks related to purified compounds (A) and LC-ESI-MS/MS based characterization of compounds 1-3 shown in (B, C and D), respectively.

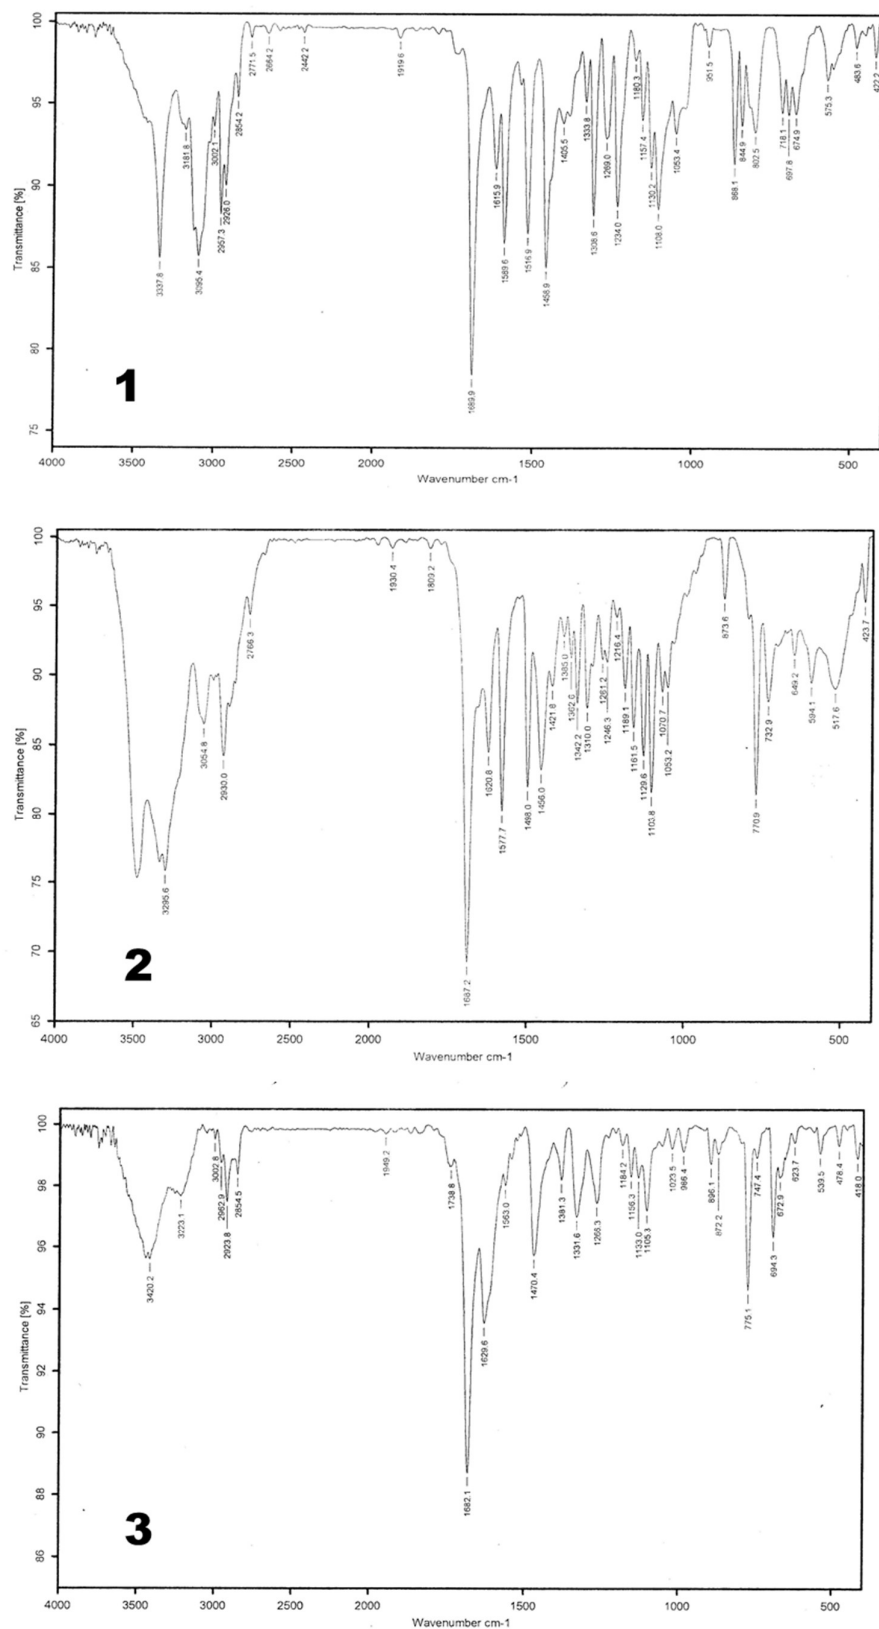

**Figure S4 : FT-IR spectrum of Compound 1,2 and 3.**

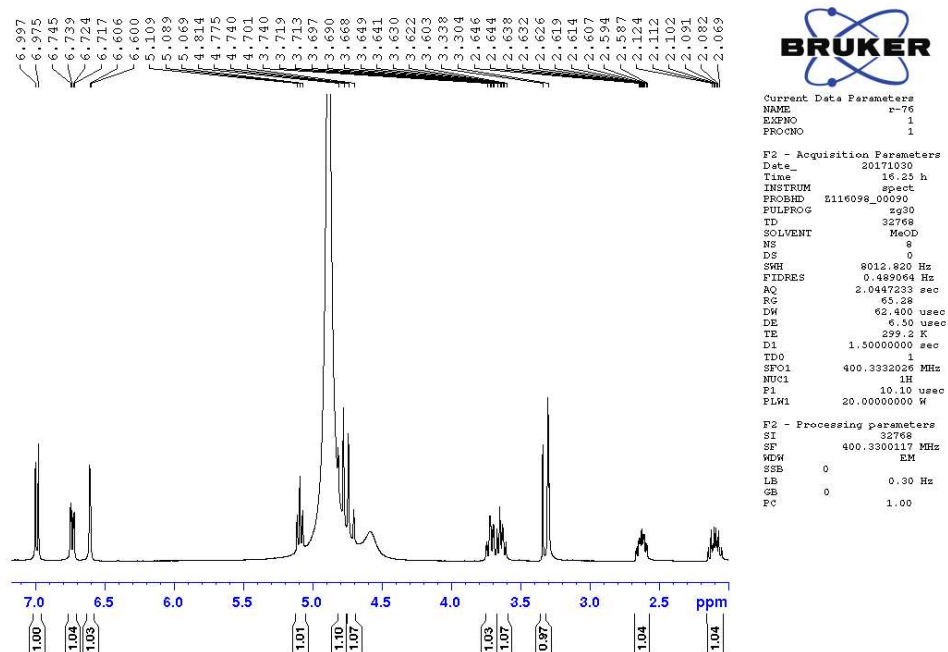

**Figure S5:** Proton NMR spectrum of compound **1**.

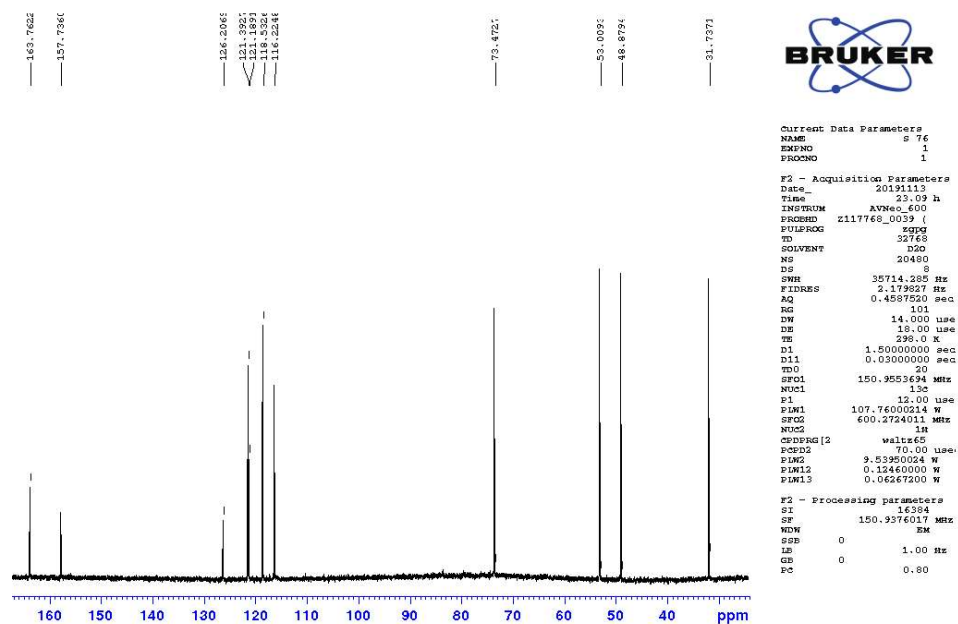

Figure S6: C-13 NMR spectrum of compound 1.

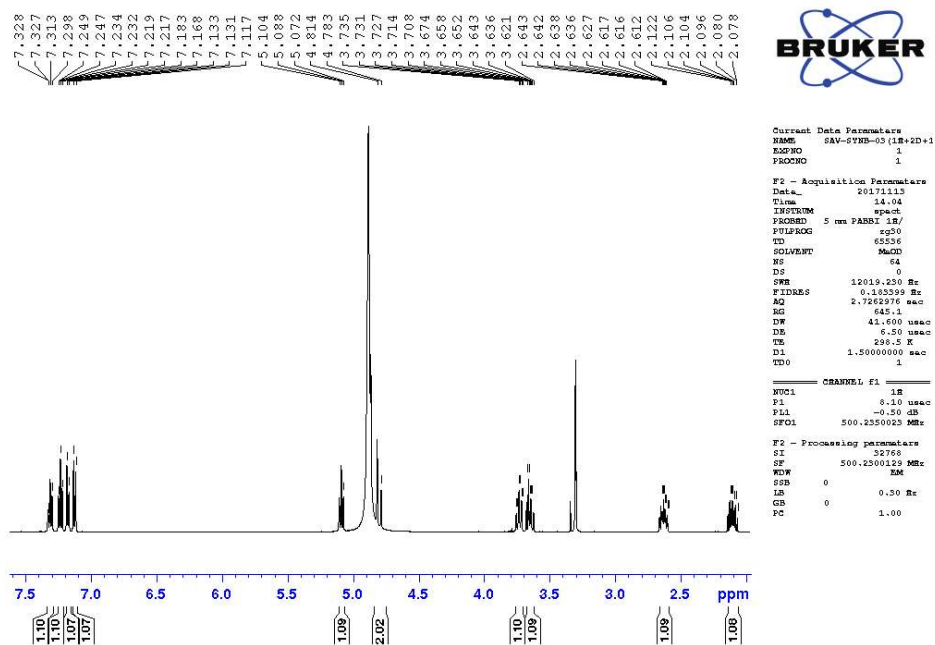

**Figure S7:** Proton NMR spectrum of compound **2**.

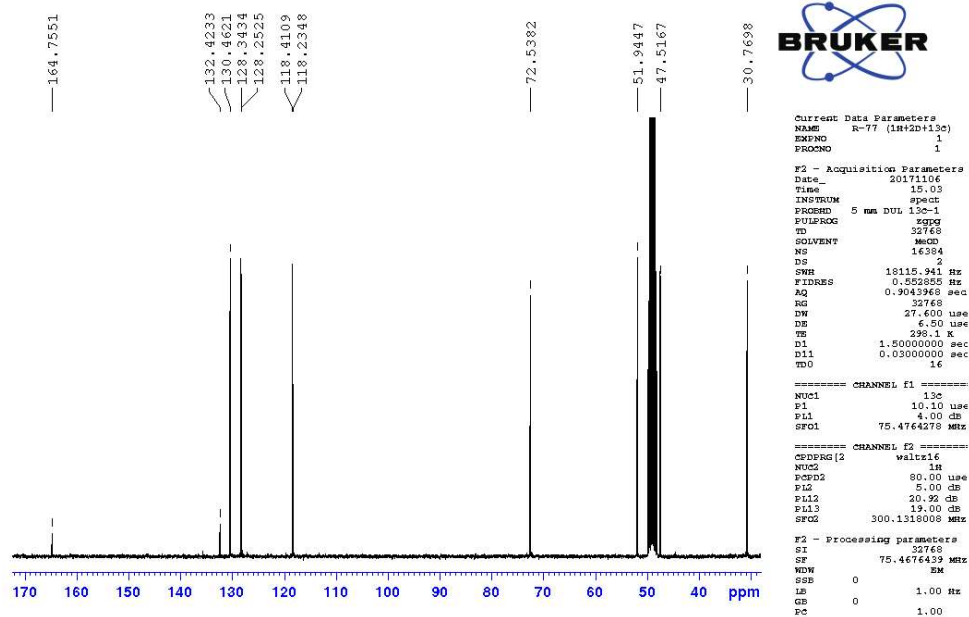

Figure S8: C-13 NMR spectrum of compound 2.

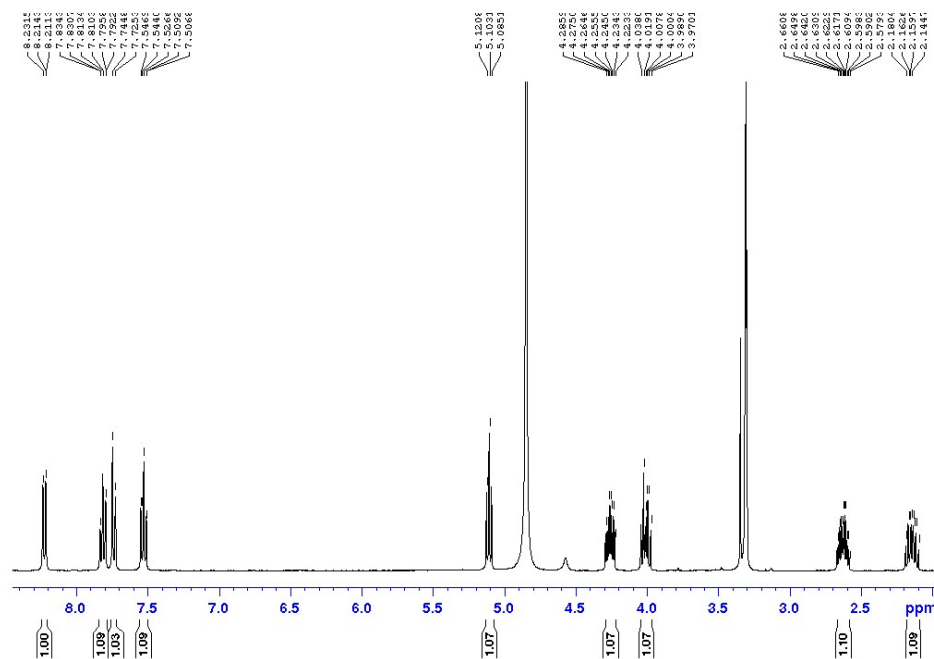

Figure S9: Proton NMR spectrum of compound 3.

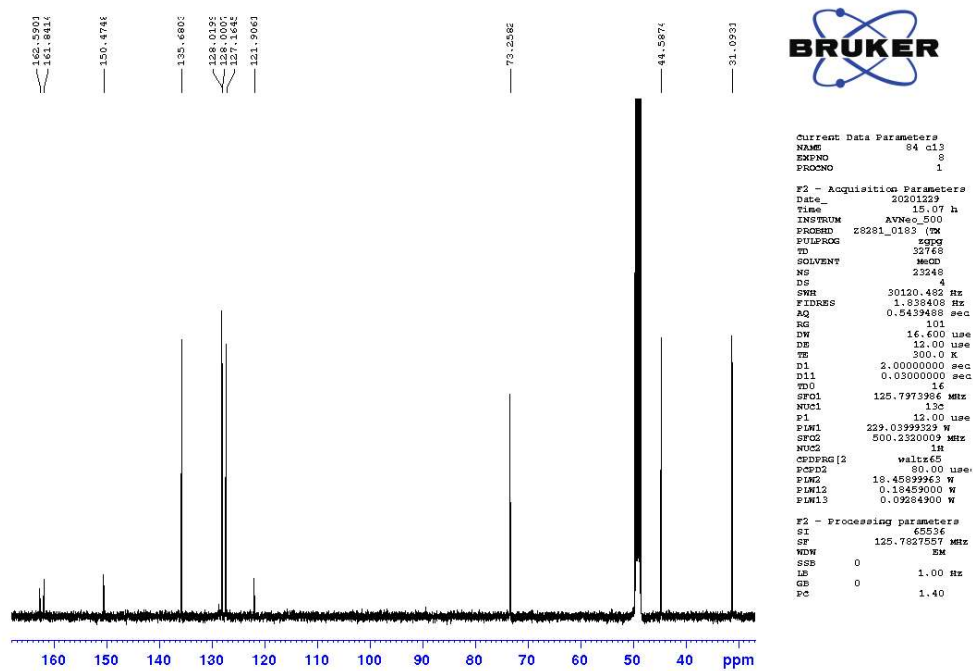

Figure S10: C-13 NMR spectrum of compound 3.

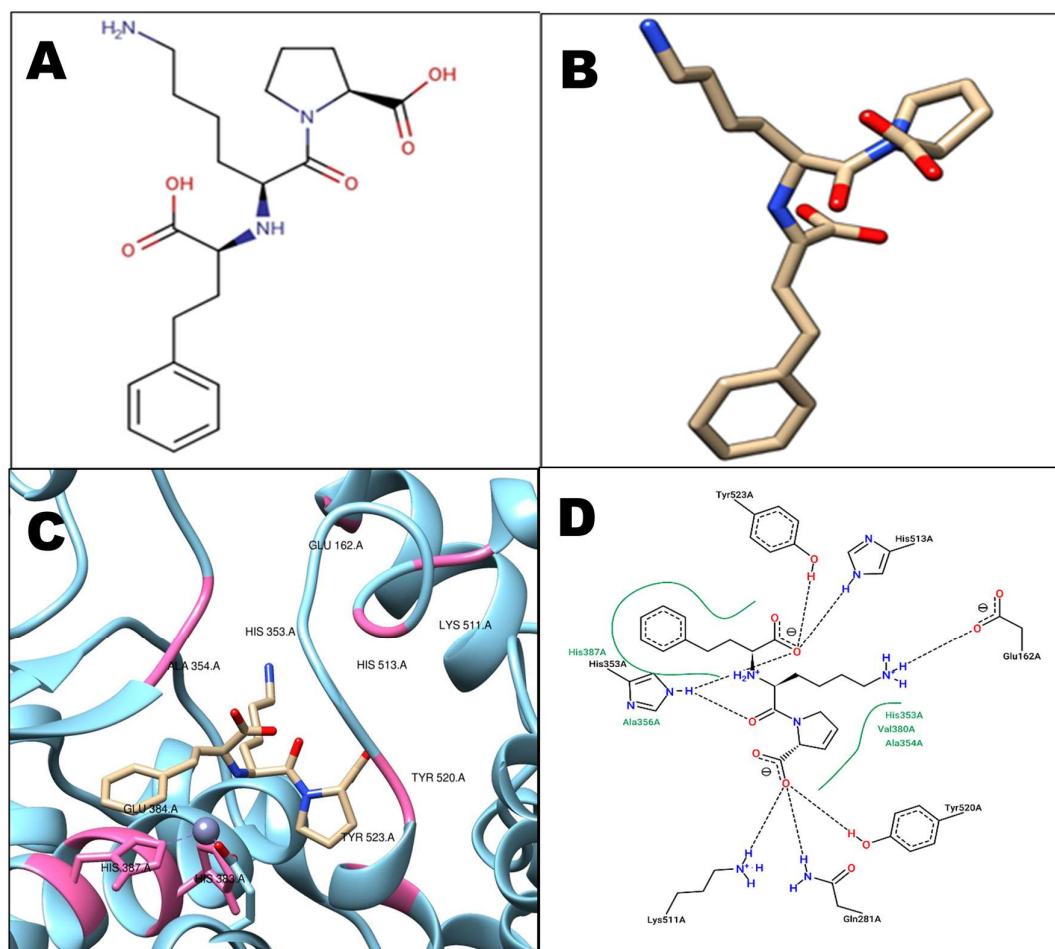

**Figure S11:** (A) 2D Structure of lisinopril, (B) 3D structure of lisinopril, (C) 3D interaction of lisinopril with ACE generated through Chimera, and (D) 2D interactions of lisinopril with ACE generated through PoseView.

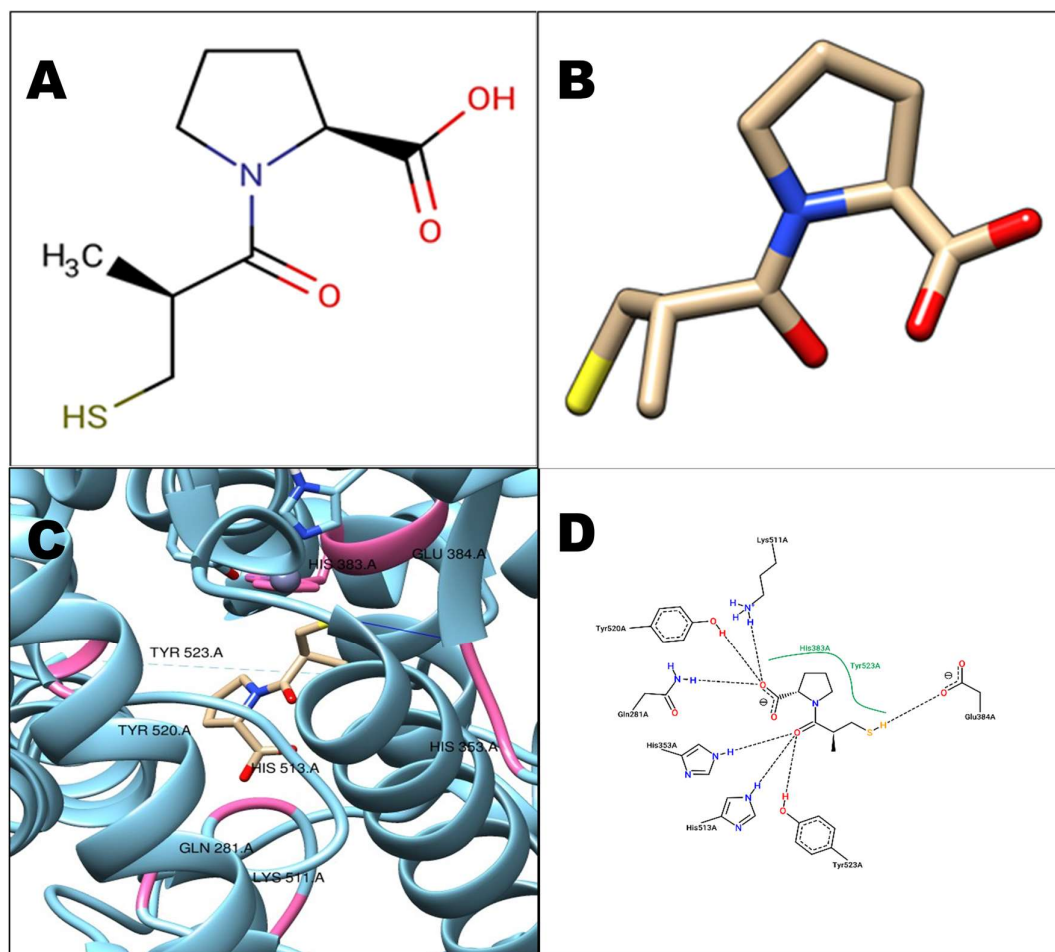

**Figure S12:** (A) 2D Structure of captopril, (B) 3D structure of captopril (C) 3D interaction of captopril with ACE generated through Chimera, and (D) 2D interactions of captopril with ACE generated through PoseView.

**Table S1:** Reaction initial velocity of ACE in enzymatic assay.

| Points                                           | Cf-Ci (mM) | tf-ti (min) | v <sup>0</sup> (mM/min) |
|--------------------------------------------------|------------|-------------|-------------------------|
| 1                                                | 0.750      | 10          | 0.0750                  |
| 2                                                | 0.371      | 10          | 0.0371                  |
| Average reaction velocity for initial 20 minutes |            |             | 0.056                   |

**Table S2:** ACE inhibitory activity of plant extracts.

| S. No. | Code | Name of plant | %Inhibitory activity | Activity |
|--------|------|---------------|----------------------|----------|
|--------|------|---------------|----------------------|----------|

|    |    |                               |       |           |
|----|----|-------------------------------|-------|-----------|
| 1  | AG | <i>Alpinia galangal</i>       | 6.15  | Active    |
| 2  | ZV | <i>Ziziphus vulgaris</i>      | 25.92 | Active    |
| 3  | BO | <i>Borago officinalis</i>     | 10.08 | Active    |
| 4  | AO | <i>Althaea officinalis</i>    | 6.69  | Active    |
| 5  | CL | <i>Cordia latifolia</i>       | 8.60  | Active    |
| 6  | VO | <i>Viola odorata</i>          | > 5%  | In active |
| 7  | GG | <i>Glycyrrhiza glabra</i>     | > 5%  | In active |
| 8  | PL | <i>Piper longum</i>           | > 5%  | In active |
| 9  | AV | <i>Adhatoda vasica</i>        | 10.15 | Active    |
| 10 | HO | <i>Hyssopus officinalis</i>   | > 5%  | In active |
| 11 | AT | <i>Anemone tetrasepala</i>    | 10.52 | Active    |
| 12 | AN | <i>Anemone obtusiloba</i>     | > 5%  | In active |
| 13 | AF | <i>Aquilegia fragrans</i>     | 12.82 | Active    |
| 14 | CQ | <i>Cissus quadrangularis</i>  | 9.78  | Active    |
| 15 | FI | <i>Fagonia indica</i>         | 11.45 | Active    |
| 16 | EO | <i>Emblica officinalis</i>    | > 5%  | In active |
| 17 | CA | <i>Centella asiatica</i>      | > 5%  | In active |
| 18 | AS | <i>Amomum subulatum</i>       | > 5%  | In active |
| 19 | DD | <i>Delphinium denudatum</i>   | > 5%  | In active |
| 20 | LA | <i>Lavandula angustifolia</i> | > 5%  | In active |
| 21 | CD | <i>Canscora decussate</i>     | > 5%  | In active |
| 22 | GB | <i>Ginko biloba</i>           | > 5%  | In active |
| 23 | HM | <i>Herpestis monniera</i>     | > 5%  | In active |
